# Supplementary material for: Evaluation and Validation of a Prediction Model for Extubation Success in Very Preterm Infants
Source: Research Square preprint supplement (doi:10.21203/rs.3.rs-894089/v1), 2021-09-15
Supplement: Supplementary file 1 [file 5077ed9e1f634a1bf6dd31a8.pdf]

**Supplementary Table 1. TRIPOD Checklist: Prediction Model Validation**

| Section/Topic                | Item | Checklist Item                                                                                                                                                                                        | Page              |
|------------------------------|------|-------------------------------------------------------------------------------------------------------------------------------------------------------------------------------------------------------|-------------------|
| <b>Title and abstract</b>    |      |                                                                                                                                                                                                       |                   |
| Title                        | 1    | Identify the study as developing and/or validating a multivariable prediction model, the target population, and the outcome to be predicted.                                                          | 1                 |
| Abstract                     | 2    | Provide a summary of objectives, study design, setting, participants, sample size, predictors, outcome, statistical analysis, results, and conclusions.                                               | 2                 |
| <b>Introduction</b>          |      |                                                                                                                                                                                                       |                   |
| Background and objectives    | 3a   | Explain the medical context (including whether diagnostic or prognostic) and rationale for developing or validating the multivariable prediction model, including references to existing models.      | 2                 |
|                              | 3b   | Specify the objectives, including whether the study describes the development or validation of the model or both.                                                                                     | 2                 |
| <b>Methods</b>               |      |                                                                                                                                                                                                       |                   |
| Source of data               | 4a   | Describe the study design or source of data (e.g., randomized trial, cohort, or registry data), separately for the development and validation data sets, if applicable.                               | 2                 |
|                              | 4b   | Specify the key study dates, including start of accrual; end of accrual; and, if applicable, end of follow-up.                                                                                        | 2                 |
| Participants                 | 5a   | Specify key elements of the study setting (e.g., primary care, secondary care, general population) including number and location of centres.                                                          | 2                 |
|                              | 5b   | Describe eligibility criteria for participants.                                                                                                                                                       | 2                 |
|                              | 5c   | Give details of treatments received, if relevant.                                                                                                                                                     | Table 2           |
| Outcome                      | 6a   | Clearly define the outcome that is predicted by the prediction model, including how and when assessed.                                                                                                | 3                 |
|                              | 6b   | Report any actions to blind assessment of the outcome to be predicted.                                                                                                                                | 3                 |
| Predictors                   | 7a   | Clearly define all predictors used in developing or validating the multivariable prediction model, including how and when they were measured.                                                         | 3                 |
|                              | 7b   | Report any actions to blind assessment of predictors for the outcome and other predictors.                                                                                                            | 3                 |
| Sample size                  | 8    | Explain how the study size was arrived at.                                                                                                                                                            | 3                 |
| Missing data                 | 9    | Describe how missing data were handled (e.g., complete-case analysis, single imputation, multiple imputation) with details of any imputation method.                                                  | 3                 |
| Statistical analysis methods | 10c  | For validation, describe how the predictions were calculated.                                                                                                                                         | 3-4               |
|                              | 10d  | Specify all measures used to assess model performance and, if relevant, to compare multiple models.                                                                                                   | 3-4               |
|                              | 10e  | Describe any model updating (e.g., recalibration) arising from the validation, if done.                                                                                                               | 4                 |
| Risk groups                  | 11   | Provide details on how risk groups were created, if done.                                                                                                                                             | N/A               |
| Development vs. validation   | 12   | For validation, identify any differences from the development data in setting, eligibility criteria, outcome, and predictors.                                                                         | 3-4               |
| <b>Results</b>               |      |                                                                                                                                                                                                       |                   |
| Participants                 | 13a  | Describe the flow of participants through the study, including the number of participants with and without the outcome and, if applicable, a summary of the follow-up time. A diagram may be helpful. | 5, Supp. Figure 1 |
|                              | 13b  | Describe the characteristics of the participants (basic demographics, clinical features, available predictors), including the number of participants with missing data for predictors and outcome.    | 5                 |
|                              | 13c  | For validation, show a comparison with the development data of the distribution of important variables (demographics, predictors and outcome).                                                        | 7-8               |
| Model performance            | 16   | Report performance measures (with CIs) for the prediction model.                                                                                                                                      | Figure 2          |
| Model-updating               | 17   | If done, report the results from any model updating (i.e., model specification, model performance).                                                                                                   | 6, Figure 2       |
| <b>Discussion</b>            |      |                                                                                                                                                                                                       |                   |
| Limitations                  | 18   | Discuss any limitations of the study (such as nonrepresentative sample, few events per predictor, missing data).                                                                                      | 9                 |
| Interpretation               | 19a  | For validation, discuss the results with reference to performance in the development data, and any other validation data.                                                                             | 7-9               |
|                              | 19b  | Give an overall interpretation of the results, considering objectives, limitations, results from similar studies, and other relevant evidence.                                                        | 7-8               |
| Implications                 | 20   | Discuss the potential clinical use of the model and implications for future research.                                                                                                                 | 9                 |
| <b>Other information</b>     |      |                                                                                                                                                                                                       |                   |
| Supplementary information    | 21   | Provide information about the availability of supplementary resources, such as study protocol, Web calculator, and data sets.                                                                         | Noted             |
| Funding                      | 22   | Give the source of funding and the role of the funders for the present study.                                                                                                                         | 1                 |

**Supplementary Table 2. Sensitivity, Specificity, Youden's J and Euclidean Distance at Various Extubation Success Probability Thresholds**

| <b>Extubation Success Probability Greater Than</b> | <b>Sensitivity</b> | <b>Specificity</b> | <b>Youden's J (Index)</b> | <b>Euclidean Distance</b> |
|----------------------------------------------------|--------------------|--------------------|---------------------------|---------------------------|
| 0.00                                               | 1.00               | 0.00               | 0.00                      | 1.00                      |
| 0.30                                               | 0.99               | 0.05               | 0.04                      | 0.95                      |
| 0.40                                               | 0.98               | 0.09               | 0.06                      | 0.91                      |
| 0.50                                               | 0.96               | 0.23               | 0.19                      | 0.77                      |
| 0.60                                               | 0.90               | 0.35               | 0.25                      | 0.66                      |
| 0.65                                               | 0.83               | 0.44               | 0.27                      | 0.59                      |
| 0.70                                               | 0.77               | 0.49               | 0.26                      | 0.56                      |
| 0.75                                               | 0.73               | 0.58               | 0.30                      | 0.50                      |
| <b>0.80</b>                                        | <b>0.63</b>        | <b>0.74</b>        | <b>0.36</b>               | <b>0.46</b>               |
| 0.85                                               | 0.50               | 0.79               | 0.29                      | 0.54                      |
| 0.90                                               | 0.34               | 0.89               | 0.24                      | 0.67                      |
| 0.95                                               | 0.17               | 0.98               | 0.15                      | 0.83                      |
| 1.00                                               | 0.00               | 1.00               | 0.00                      | 1.00                      |

Values are rounded. The threshold with the highest Youden's J value is bolded.

## Supplementary Figure 1. Flow Diagram

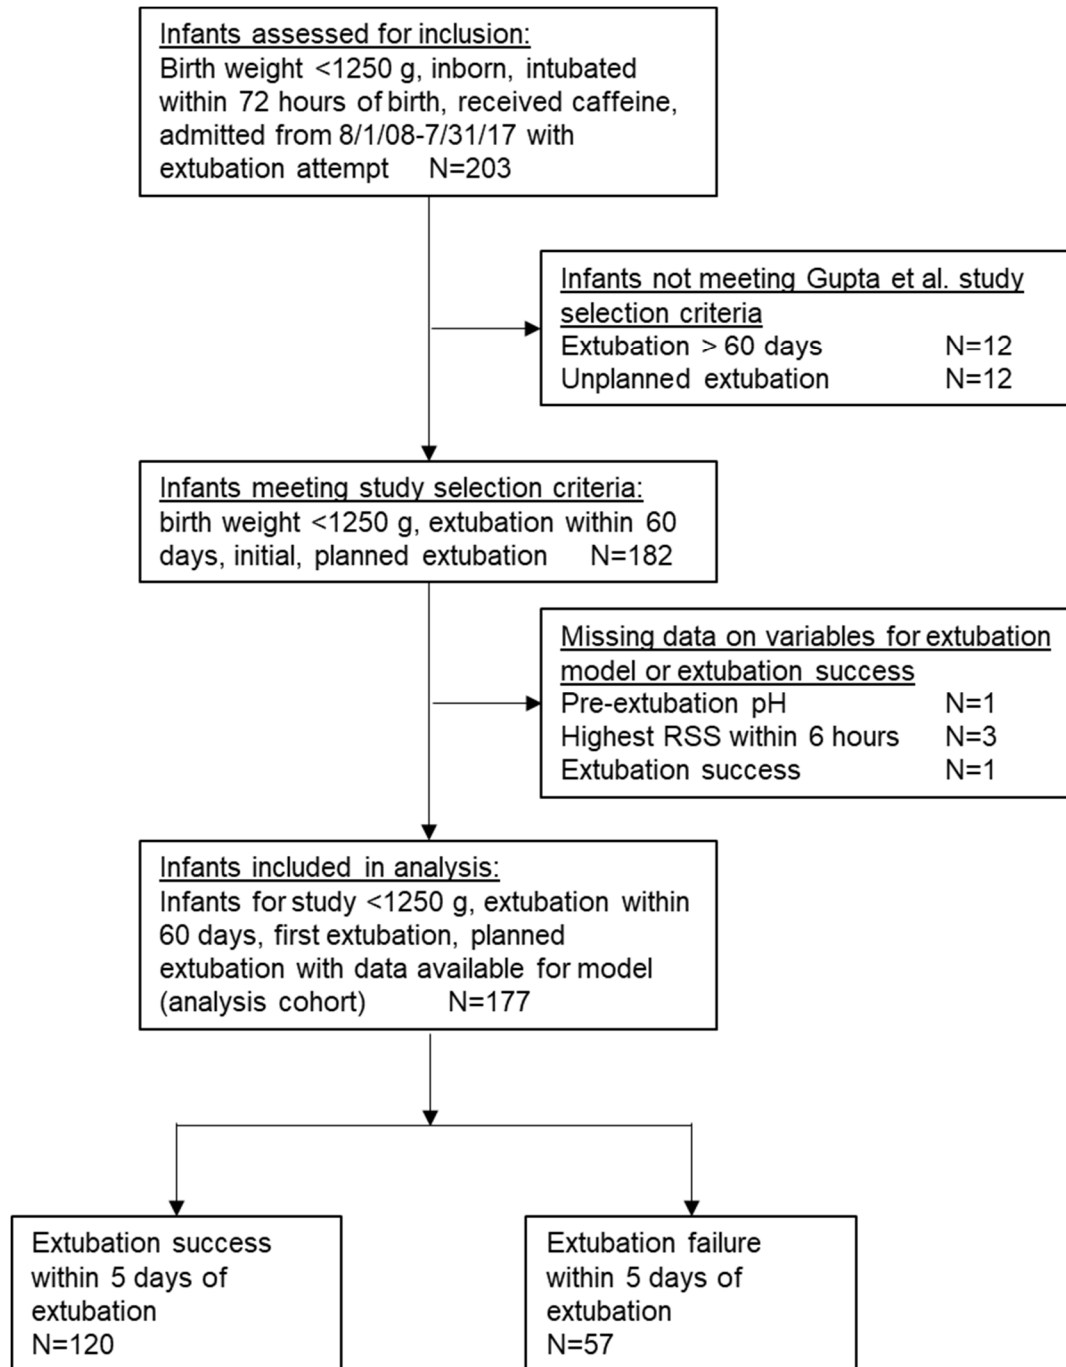

Supplementary Figure 2. Optimal Cut-Point of Predicted Probability of Extubation Success using Youden's J and Euclidean distance

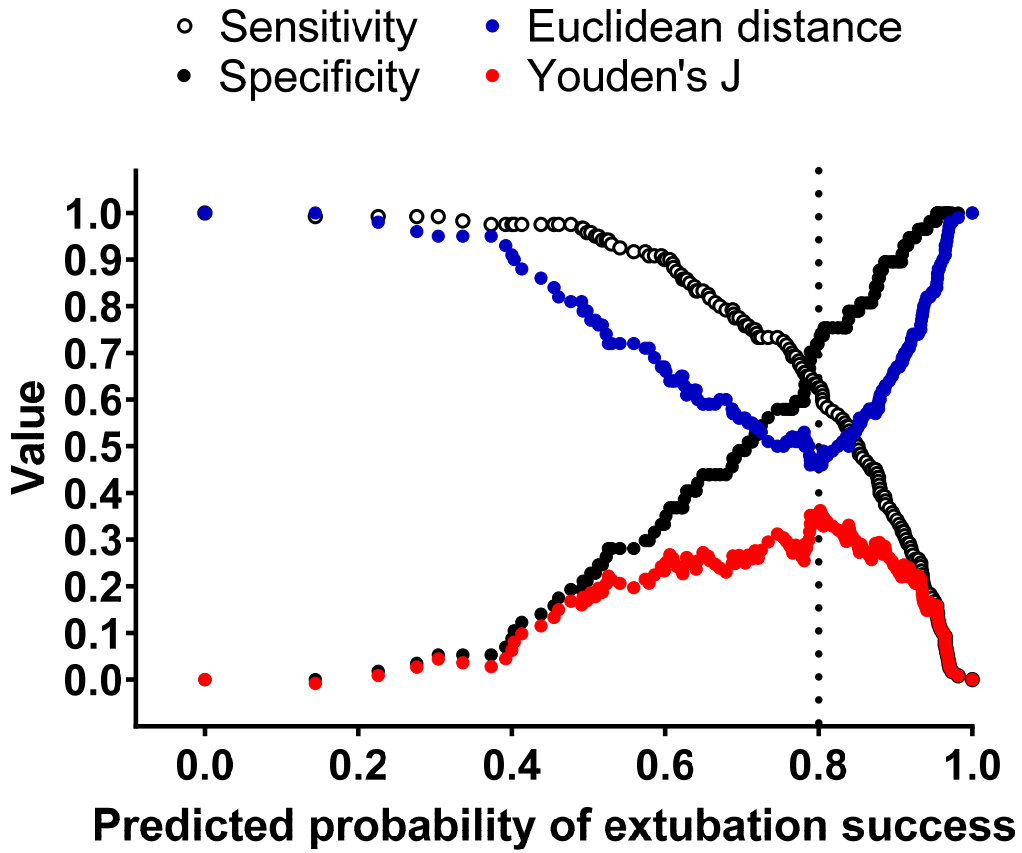

Legend: Figure shows Youden's J and Euclidean distances, along with sensitivity and specificity, by predicted probabilities of extubation success. Of note, the Youden's J was  $<0.5$  at all thresholds.

Supplementary Figure 3. Odds Ratios of Predictors in Derivation and Validation Cohorts

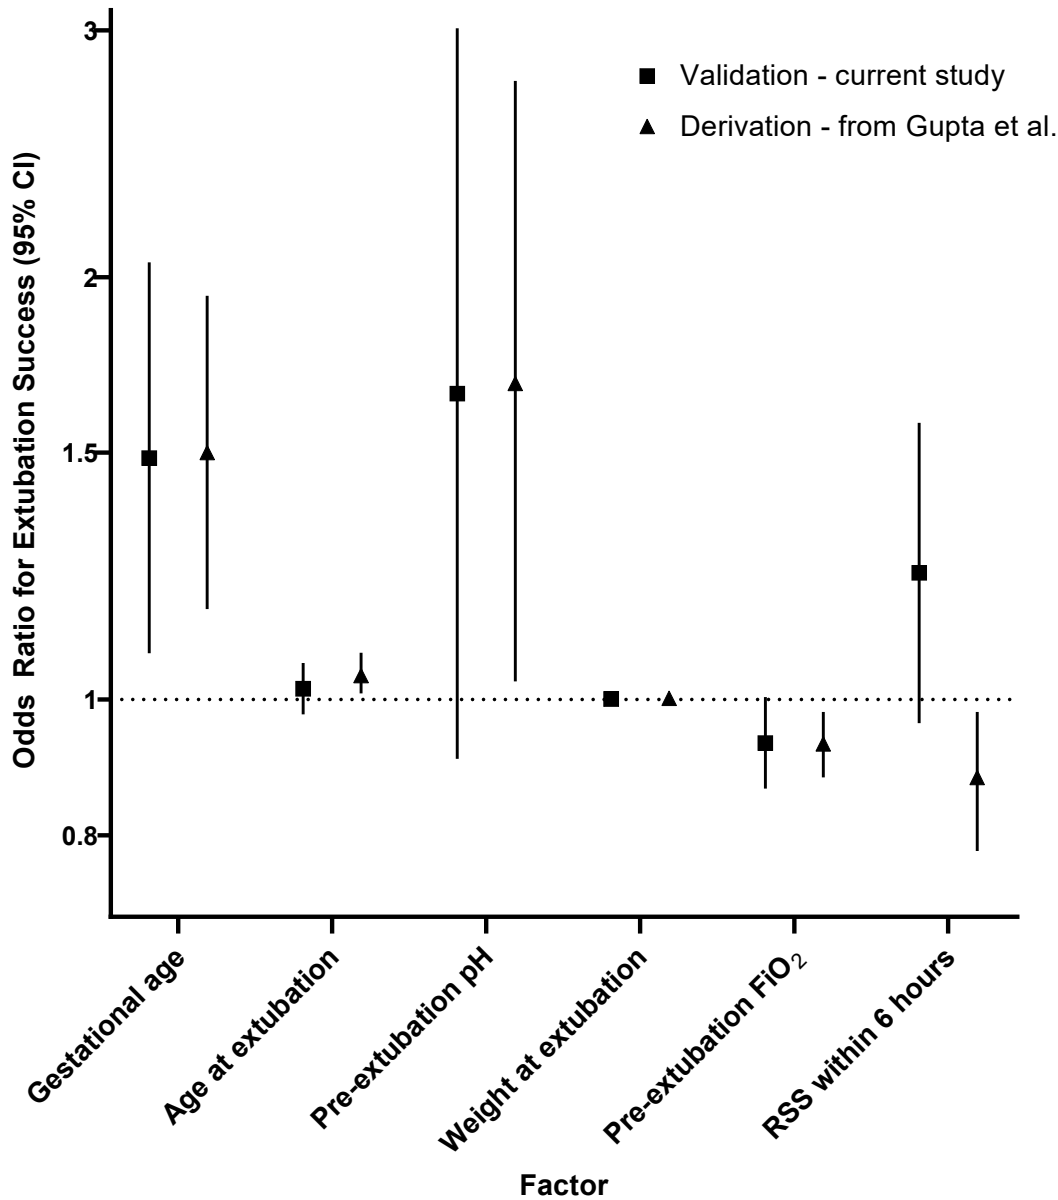

Legend: Odds ratios of the 6 model predictors in the derivation cohort (Gupta et al. 2020) and the validation cohort (current study) are shown. Abbreviations: FiO<sub>2</sub>, fraction of inspired oxygen; RSS, respiratory severity score.

**Supplementary Figure 4. Predicted Probability of Extubation Success by Severity of BPD**

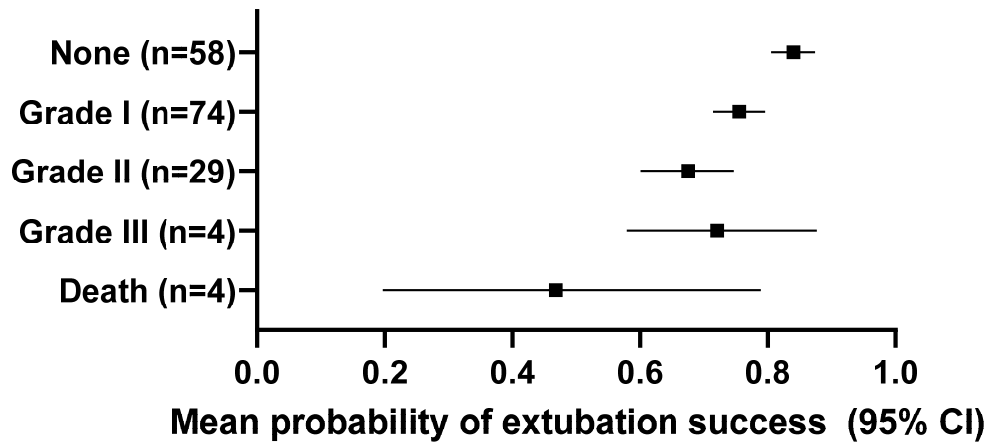

Legend: Figure shows the predicted probability of extubation success (derived using the coefficients from the derivation cohort) by the severity of BPD according to published grading criteria (Jensen et al. 2019). The predicted probability of extubation success significantly differed among the grades of BPD ( $P < 0.001$ ) and remained significantly different after adjusting for gestational age ( $P = 0.04$  from Type III test of effect in multivariable linear regression).
